# Supplementary material for: Cyclodextrin and its derivatives as effective excipients for amorphous ulipristal acetate systems
Source: Royal Society of Chemistry journal article supplement (doi:10.1039/d1ra09420c), 2022-01-01
Supplement: d1ra09420c1.pdf [file d1ra09420c1.pdf]

## Electronic Supplementary Information (ESI)

### Cyclodextrin and its derivatives as effective excipients for the Ulipristal acetate amorphous systems

Peng Wang<sup>1</sup>, Yan Wang<sup>2</sup>, Zili Suo<sup>1</sup>, Yuanming Zhai<sup>3</sup>, and Hui Li<sup>1\*</sup>

1. College of Chemical Engineering Sichuan University, Chengdu 610065, PR China

2. Sichuan Center for Disease Control and Prevention, Chengdu Sichuan, China.

3. Analytical & Testing Center, Sichuan University, P.R. China

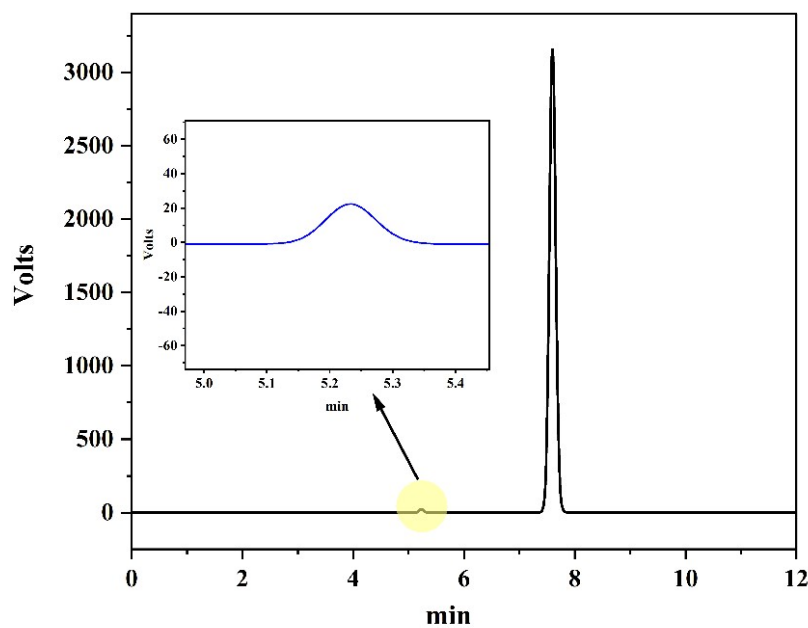

**Fig. S1** HPLC spectrogram of the UPA under a certain concentration. Part of the enlarged image is the peak of N-desmethyulipristal acetate.

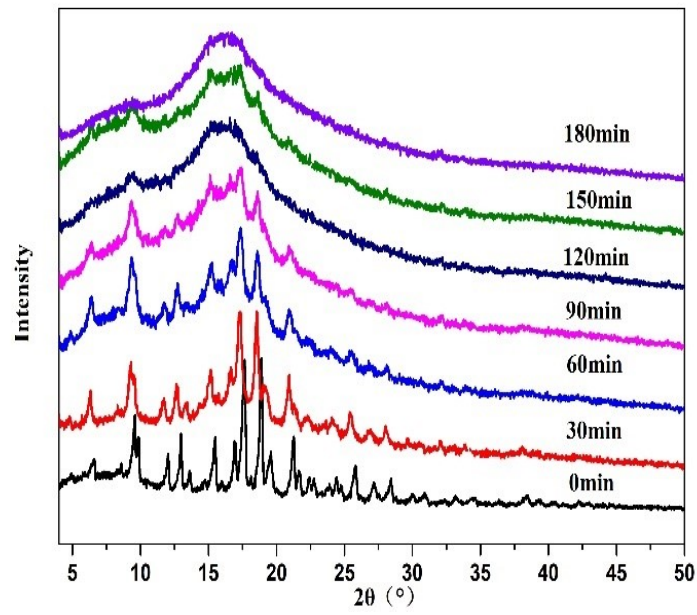

**Fig. S2** Preparation of amorphous UPA

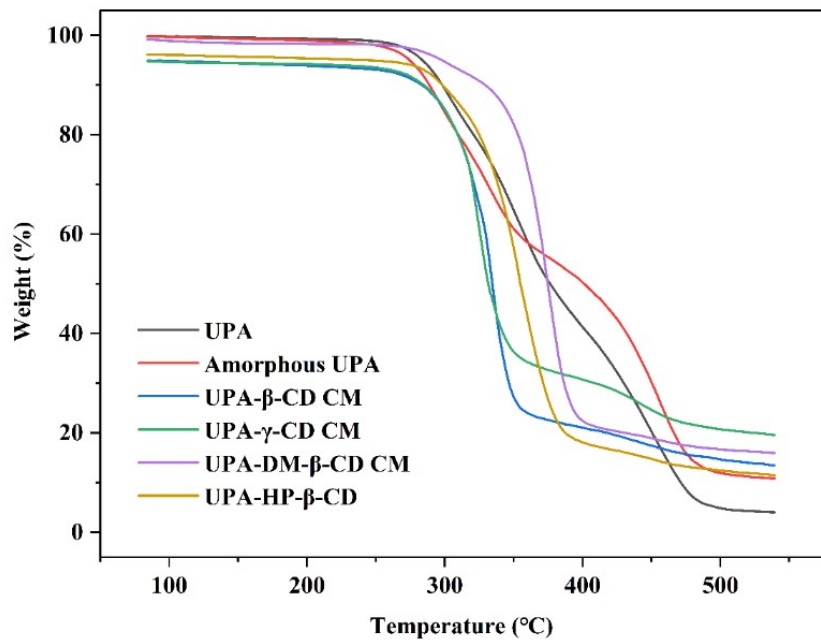

**Fig. S3** TGA curves of different UPA solid forms.

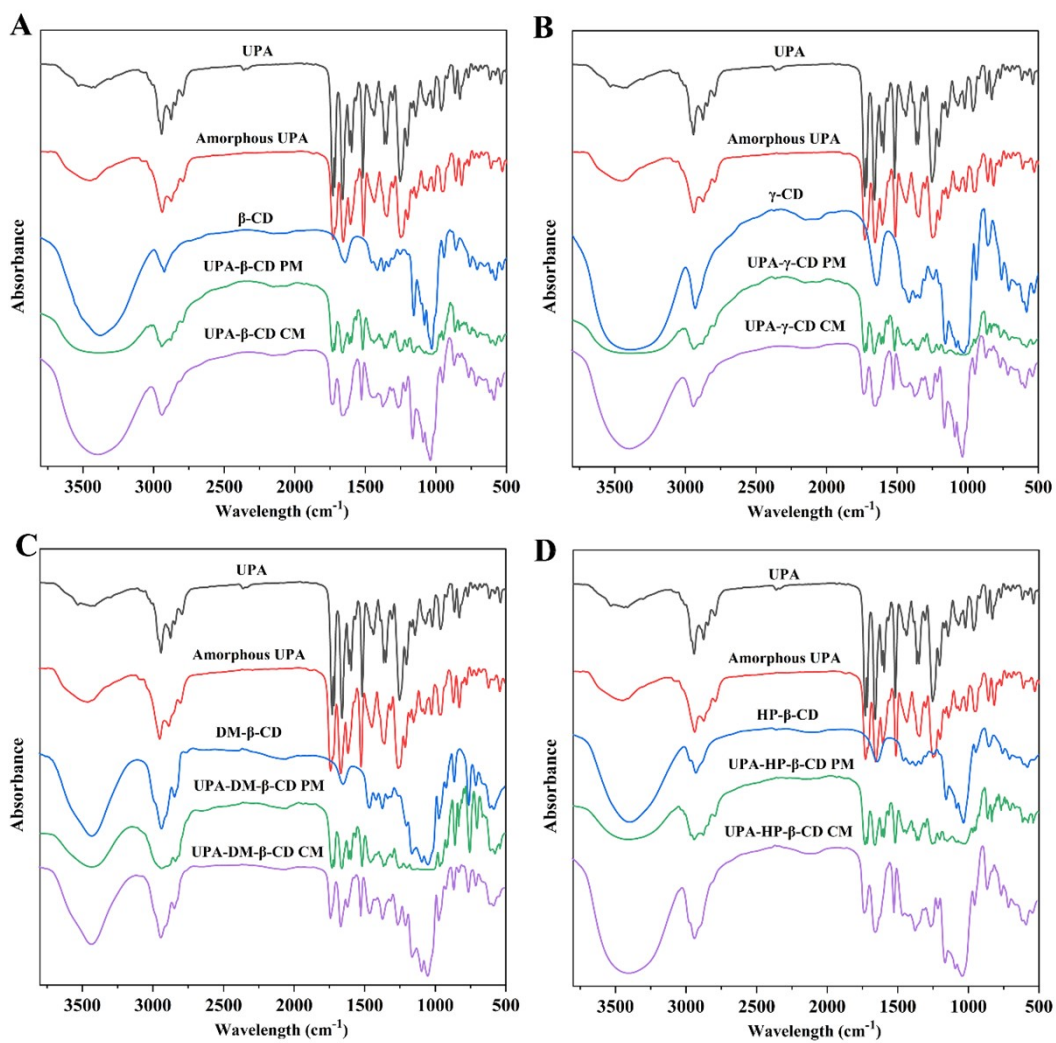

**Fig. S4** FT-IR spectra of UPA-β-CD (A), UPA-γ-CD (B), UPA-DM-β-CD (C), and UPA-HP-β-CD (D). Each picture from top to bottom: crystalline UPA, amorphous UPA, CD, UPA-CD PM, and UPA-CD CM.

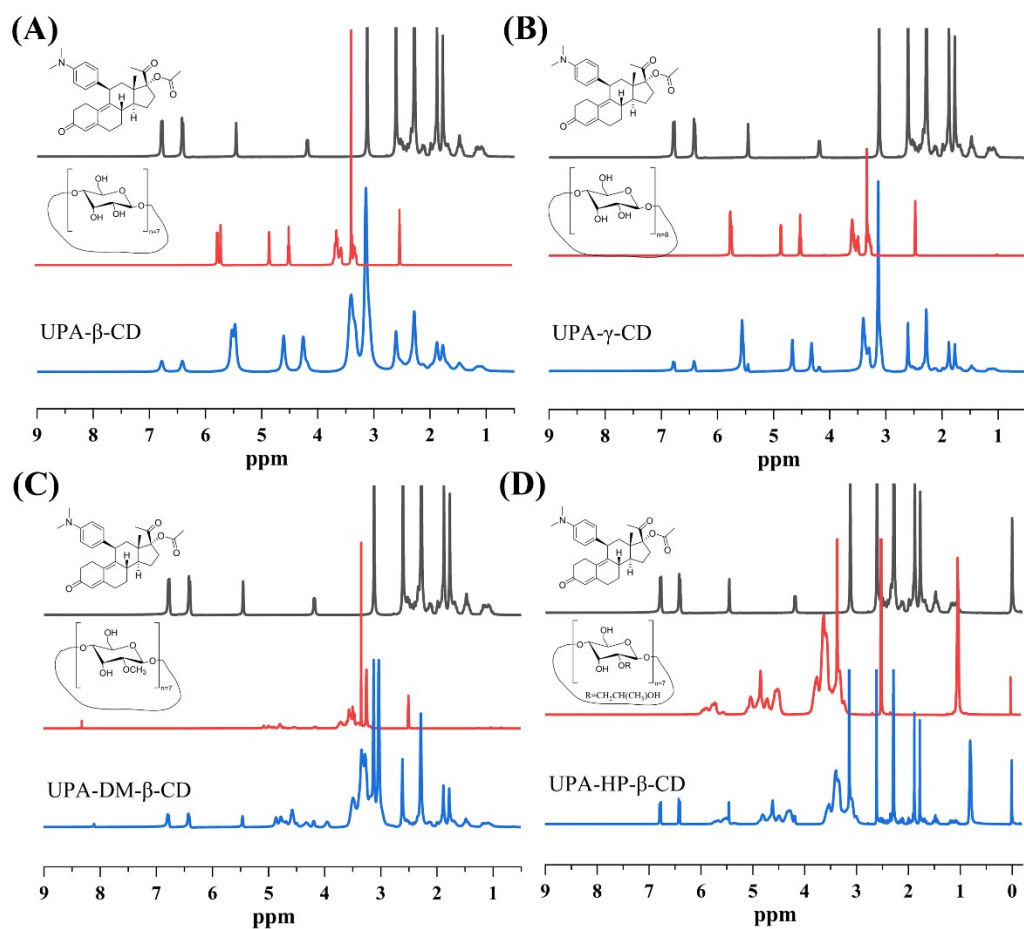

**Fig. S5** <sup>1</sup>H NMR spectra of UPA, CDs, and UPA-β-CD (A), UPA-γ-CD (B), UPA-DM-β-CD (C), and UPA-HP-β-CD (D).

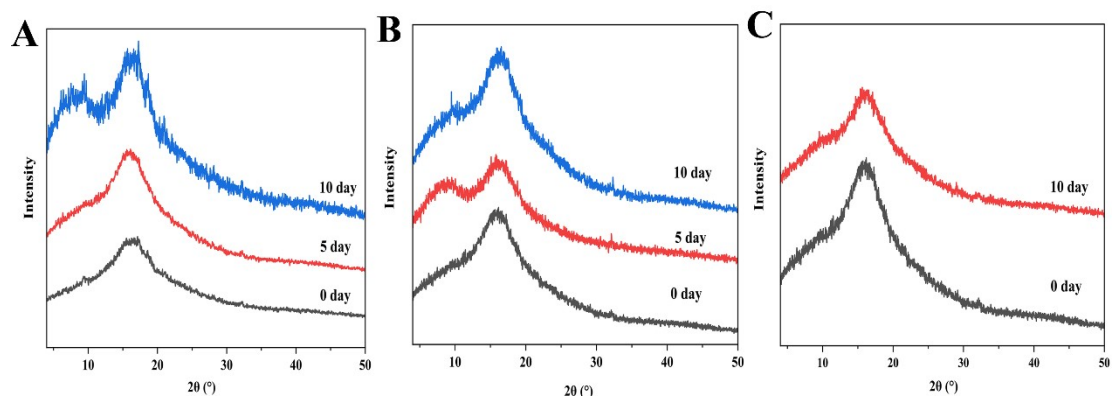

**Fig. S6** Stability of amorphous UPA under high temperature (A), high humidity (B), and light (C) conditions.

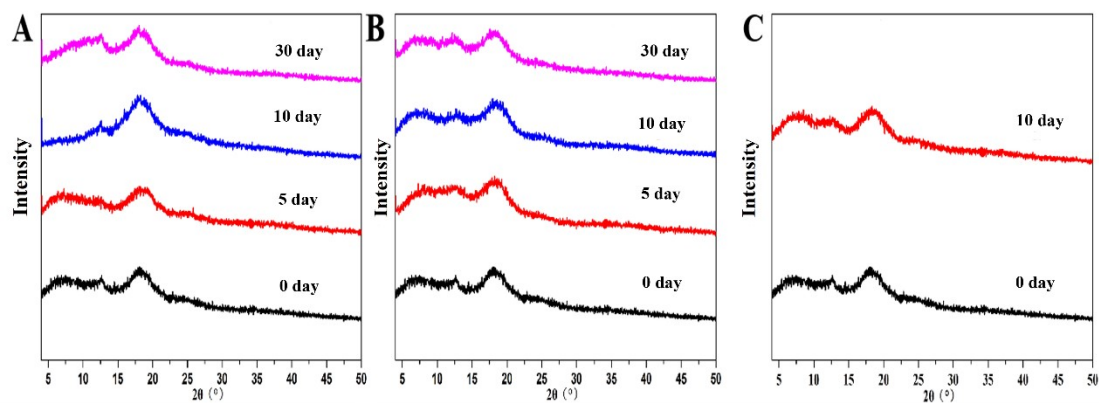

**Fig. S7** Stability of UPA-β-CD amorphous at high temperature (A), high humidity (B), and light (C).

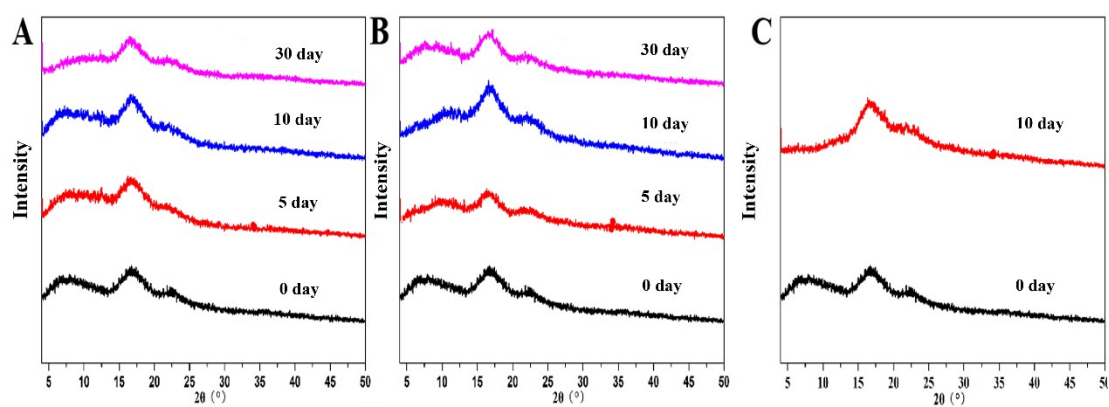

**Fig. S8** Stability of UPA-γ-CD amorphous at high temperature (A), high humidity (B), and light (C).

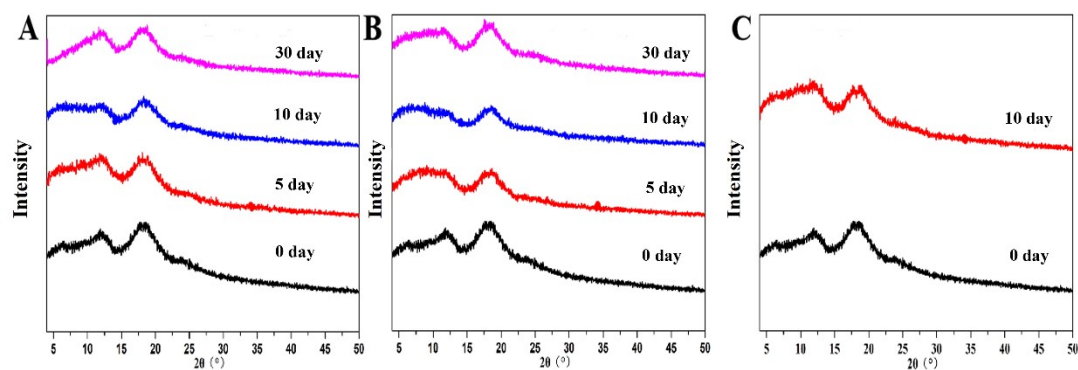

**Fig. S9** Stability of UPA-DM-β-CD amorphous at high temperature (A), high humidity (B), and light (C).

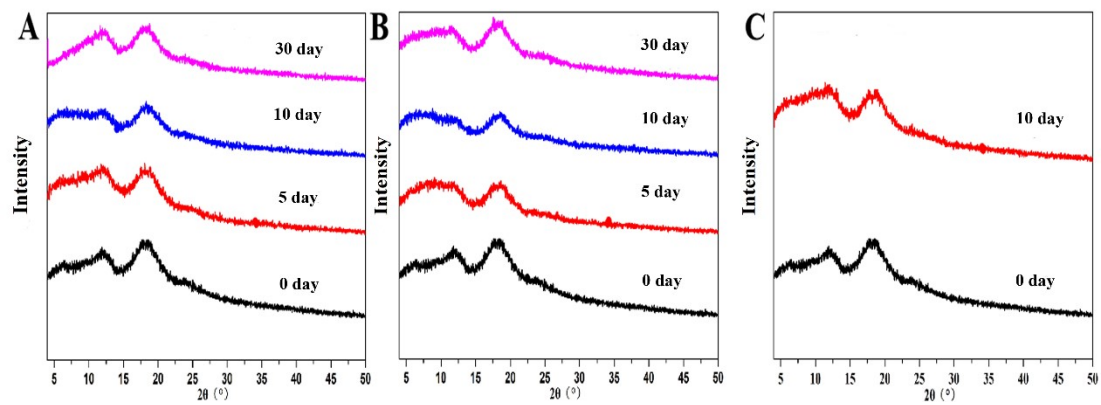

**Fig. S10** Stability of UPA-HP- $\beta$ -CD amorphous at high temperature (A), high humidity (B), and light (C)
